# Supplementary material for: Tacrine-Based Hybrids: Past, Present, and Future
Source: MDPI journal article supplement (doi:10.3390/ijms24021717), 2023-01-15
Supplement: s1 [file s1]

**Table S1.** Tacrine – based hybrids with various biological activities, published in 2006 - 2022.

|                                                         | Tacrin-like moiety  | Second moiety                            | AChE/BChE, IC <sub>50</sub>                                                                                                             | Biological action                                                                                                                                      | Ref      |
|---------------------------------------------------------|---------------------|------------------------------------------|-----------------------------------------------------------------------------------------------------------------------------------------|--------------------------------------------------------------------------------------------------------------------------------------------------------|----------|
| <b>Tacrine – Melatonin hybrids</b>                      |                     |                                          |                                                                                                                                         |                                                                                                                                                        |          |
| 1 - 13                                                  | Tacrine<br>6-Cl-THA | Melatonin                                | Human AChE/BChE<br>0.008 / 7.8 nM (7)                                                                                                   | Antioxidant activity                                                                                                                                   | [39]     |
| 1 - 23                                                  | Tacrine<br>6-Cl-THA | Melatonin                                | Human AChE/BChE<br>0.008 / 7.8 nM (7)<br>0.725 / 175 nM (3)<br>0.7 / 250 nM (6)                                                         | Inhibition of A $\beta$ self-aggregation<br>Neuroprotection from A $\beta$ and damage caused by mitochondrial free radicals – incuded oxidative stress | [40]     |
| 24 - 31                                                 | Tacrine<br>7-MEOTA  | Melatonin + Ferulic acid                 | AChE from electric eel, BChE from equine serum<br>3.62 / 1.25 nM (28)<br>8.37 / 2.91 nM (26)<br>Human AChE/ BuChE<br>1290 / 234 nM (26) | Antioxidant activity<br>Neuroprotection                                                                                                                | [41]     |
| <b>Another acrine hybrids with antioxidant activity</b> |                     |                                          |                                                                                                                                         |                                                                                                                                                        |          |
| 32 - 48                                                 | Tacrine<br>6-Cl-THA | 8-Hydroxyquinoline                       | AChE from bovine, BChE from horse serum<br>20 / 5 nM (35)<br>75 / 2 nM (40)<br>85 / 6.5 nM (45)<br>Human AChE/BChE<br>5.5 / 20 nM (35)  | Inhibition of A $\beta$ aggregation, antioxidant activity, metal-chelating properties                                                                  | [42]     |
| 49 - 66                                                 | Tacrine             | Substituted benzene or pyridine moieties | AChE from electric eel, BChE from equine serum<br>4.55 / 3.41 nM (58)                                                                   | Antioxidant activity<br>Antiaggregation properties                                                                                                     | [43, 44] |
| 67 - 94                                                 | Tacrine<br>6-Cl-THA | 4-oxo-4H-chromene                        | AChE from bovine, BChE from horse serum<br>75 / 0.18 nM (70)<br>0.035 / 5.0 nM (88)<br>0.775 / 0.038 nM (74)                            | Antioxidant activity<br>Human BACE-1 inhibition                                                                                                        | [45]     |
| 95 - 100                                                | Tacrine<br>6-Cl-THA | Caffeic acid                             | Human AChE/BChE<br>0.035 / 5.0 nM (88)<br>AChE from electric eel, BChE from horse serum<br>0.3 / 29.5 $\mu$ M (99)                      | Antioxidant activity<br>Antiaggregation properties<br>Neuroprotection<br>Metal- chelating properties                                                   | [46]     |
| 101                                                     | Tacrine             | Silibinin                                | AChE from electric eel, BChE from equine serum<br>53.9 / 49.7 nM (101)                                                                  | Low hepatotoxicity                                                                                                                                     | [47, 48] |
| 102 - 110                                               | Tacrine             | Ebselen                                  | AChE from electric eel, BChE from equine serum<br>6.32 / 4.37 nM (106)<br>2.55 / 2.80 nM (110)                                          | Antioxidant activity                                                                                                                                   | [49]     |

|                                                   |                                |                                     |                                                                                                                                         |                                                                                                     |             |
|---------------------------------------------------|--------------------------------|-------------------------------------|-----------------------------------------------------------------------------------------------------------------------------------------|-----------------------------------------------------------------------------------------------------|-------------|
| 111 -<br>127                                      | Tacrine                        | b-Carbolines (pyrido[3,4 -b]indole) | AChE from electric eel, BChE from equine serum<br>21.6 / 39.8 nM (122)                                                                  | Antioxidant activity<br>Metal chelating properties<br>Neuroprotection<br>Antiaggregation properties | [50]        |
| 128 -<br>148                                      | Tacrine<br>6-Cl-THA<br>7-MEOTA | Trolox                              | Human AChE/BChE<br>0.08 / 0.54 $\mu$ M (148)                                                                                            | Antioxidant activity                                                                                | [51]        |
| 149 -<br>153                                      | Tacrine                        | N,N-dimethylated flavonoids         | AChE from electric eel, BChE from equine serum<br>59.61 / 46.16 nM (152)<br>94.56 / 24.67 nM (153)                                      | Antioxidant activity<br>Antiaggregation properties<br>Neuroprotection                               | [52]        |
| 154 -<br>156                                      | Tacrine                        | Hydroxybenzoyl-pyridone             | AChE from electric eel<br>0.57 $\pm$ 0.05 $\mu$ m (156)                                                                                 | Antioxidant activity<br>Metal-chelating properties                                                  | [53]        |
| 157 -<br>191                                      | Tacrine                        | Phenolic acids Ligustrazine         | AChE from electric eel, BChE from equine serum<br>3.9 / 24.3 nM (165)<br>2.6 / 28.6 nM (175)<br>Human AChE/BChE<br>65.2 / 48.8 nM (165) | Antioxidant activity<br>Antiaggregation properties<br>Neuroprotection<br>Low hepatotoxicity         | [54,<br>55] |
| 192 -<br>210                                      | Tacrine<br>6-Cl-THA            | Antioxidant CR- 6                   | Human AChE/BChE<br>0.44 / 17.4 nM (207)<br>0.12 / 13.4 nM (208)<br>0.27 / 18.3 nM (209)                                                 | Antioxidant activity<br>Antiaggregation properties<br>Neuroprotection                               | [56]        |
| 211 -<br>240                                      | Tacrine                        | Chalkone                            | BChE from equine serum<br>0.372 / 5.328 $\mu$ M (225)<br>0.801 $\mu$ M/- (226)<br>0.327 $\mu$ M /- (216)                                | Neuroprotection                                                                                     | [57]        |
| 241 -<br>249                                      | Huprine Y                      | Capsaicin                           | Human AChE/BChE<br>0.77 / 30.6 nM (243)<br>1.06 / 7.3 nM (249)                                                                          | BACE-1 inhibition<br>Antioxidant activity                                                           | [58]        |
| <b>Tacrine - Ferulic acid hybrids</b>             |                                |                                     |                                                                                                                                         |                                                                                                     |             |
| 250 -<br>254                                      | Tacrine                        | Ferulic acid                        | AChE from electric eel, BChE from equine serum<br>7.6 / 5.9 nM (252)<br>4.4 / 6.7 nM (253)                                              | Antioxidant activity                                                                                | [59,<br>60] |
| 255                                               | Tacrine                        | Ferulic acid                        | -                                                                                                                                       | Antiaggregation properties<br>Antioxidant activity                                                  | [61]        |
| 256 -<br>276                                      | Tacrine                        | Ferulic acid + NO-donors            | AChE from electric eel, BChE from equine serum<br>10.9 / 17.1 nM (262)                                                                  | Vascular relaxation (NO -<br>donating properties)                                                   | [62]        |
| 277 -<br>281                                      | Tacrine                        | Ferulic acid                        | 52.7 / 215.4 nM (279)<br>61.7 / 109.6 nM (280)                                                                                          | Neuroprotection<br>Metal-chelating properties                                                       | [63]        |
| 282 -<br>294                                      | Tacrine                        | Ferulic acid                        | AChE from electric eel, BChE from horse serum<br>49.5 / 69.4 nM (285)<br>37.0 / 101.4 nM (288)                                          | Antiaggregation properties                                                                          | [64]        |
| <b>Tacrine hybrids with NO-donating molecules</b> |                                |                                     |                                                                                                                                         |                                                                                                     |             |

|                                                  |                                |                             |                                                                                                                      |                                                                                                                                                |          |
|--------------------------------------------------|--------------------------------|-----------------------------|----------------------------------------------------------------------------------------------------------------------|------------------------------------------------------------------------------------------------------------------------------------------------|----------|
| 295 - 309                                        | Tacrine                        | NO-donating groups          | AChE from electric eel, BChE from equine serum<br>28.2 / 13.5 nM (295)<br>5.6 / 9.9 nM (303)<br>226.0 / 7.3 nM (308) | Vessel relaxant activity<br>Hepatoprotective effects                                                                                           | [65]     |
| 310 - 317                                        | Tacrine                        | NO-donating groups          | AChE from electric eel, BChE from equine serum<br>9.1 / 7.3 nM (310)<br>7.7 / 17.0 nM (314)                          | -                                                                                                                                              | [66]     |
| <b>Tacrine – phenothiazine hybrids</b>           |                                |                             |                                                                                                                      |                                                                                                                                                |          |
| 318 - 320                                        | Tacrine                        | Phenothiazine               | AChE from rat brain homogenate 89 nM / - (318)                                                                       | Reduce P-Tau accumulation<br>Binding with A $\beta$ fibrils                                                                                    | [67]     |
| 321 - 356                                        | Tacrine<br>6-Cl-THA<br>7-MEOTA | Phenothiazine               | Human AChE/BChE<br>2040 / 15 nM (321)<br>8 / 190 nM (332)                                                            | Inhibition of Self-Induced A $\beta$ <sub>1-42</sub> Aggregation<br>Inhibition of $\tau$ (306–336) peptide aggregation                         | [68]     |
| <b>Tacrine – benzotiazole/benzofuran hybrids</b> |                                |                             |                                                                                                                      |                                                                                                                                                |          |
| 357 - 364                                        | Tacrine                        | Benzotiazole<br>Benzofurane | AChE from electric eel, BChE from equine serum<br>0.017 / 0.122 $\mu$ M (359)                                        | Antiaggregating properties                                                                                                                     | [69, 70] |
| 365 - 369                                        | Tacrine                        | Benzotiazole                | AChE from electric eel<br>0.34 / - $\mu$ M (365)                                                                     | Antiaggregating properties (366)<br><i>Ex vivo</i> improvement cell viability in cells treated with A $\beta$ <sub>42</sub> peptide (368, 369) | [70]     |
| 370 - 395                                        | Tacrine                        | Benzofuran                  | Human AChE/BChE<br>0.86 / 2.18 nM (386)                                                                              | Antiaggregating properties<br>Inhibition of hBACE-1 activity                                                                                   | [71]     |
| 396 - 401                                        | Tacrine<br>6-Cl-THA            | Benzotiazole                | AChE from electric eel<br>0.06 $\mu$ M (397)                                                                         | Antiaggregating properties<br>Neuroprotective effects                                                                                          | [72]     |
| 402 - 413                                        | Tacrine<br>6-Cl-THA            | Benzofuran                  | AChE from Electric eel<br>0.12 $\mu$ M (404)<br>0.13 $\mu$ M (408)<br>0.13 $\mu$ M (412)                             | Antiaggregating properties<br>Neuroprotection                                                                                                  | [73]     |
| 414 - 438                                        | Tacrine<br>6-Cl-THA<br>7-MEOTA | Benzotiazole                | Human AChE/BChE<br>1727 / 8 nM (422)<br>4 / 799 nM (428)<br>55 / 41 nM (429)<br>18 / 4657 nM (436)                   | Antiaggregation properties<br>Low hepatotoxicity                                                                                               | [74]     |
| <b>Tacrine hybrids with NSAIDS</b>               |                                |                             |                                                                                                                      |                                                                                                                                                |          |
| 439 - 443                                        | Tacrine                        | Flurbiprofen                | AChE from electric eel, BChE from equine serum<br>19.3 / 3.7 nM (442)<br>34.5 / 2.1 nM (443)                         | Inhibition of of amyloid-b formation                                                                                                           | [75]     |
| 444 - 455                                        | Tacrine                        | Flurbiprofen + NO-donors    | AChE from electric eel, BChE from equine serum<br>4309.5 / 7.6 nM (447)<br>1456.4 / 3.9 nM (455)                     | Vasorelaxation effect                                                                                                                          | [76]     |
| 456 - 463                                        | Tacrine                        | Flurbiprofen + NO-donors    | AChE from electric eel, BChE from equine serum                                                                       | Inhibition of of amyloid-b formation<br>Vascular relaxation                                                                                    | [77]     |

|                                              |                     |                                     |                                                                                                                                                                               |                                                                                                                                                                                                                                                                                                     |           |
|----------------------------------------------|---------------------|-------------------------------------|-------------------------------------------------------------------------------------------------------------------------------------------------------------------------------|-----------------------------------------------------------------------------------------------------------------------------------------------------------------------------------------------------------------------------------------------------------------------------------------------------|-----------|
|                                              |                     |                                     | 9.1 / 2.5 nM (456)<br>12.5 / 1.0 nM (460)                                                                                                                                     |                                                                                                                                                                                                                                                                                                     |           |
| 464 - 471                                    | Tacrine             | Indometacine                        | AChE from electric eel, BChE from equine serum<br>62 / 30 nM (467)<br>99 / 6 nM (469)<br>10 / 57 nM (471)                                                                     | Antioxidant activity<br>Low hepatotoxicity                                                                                                                                                                                                                                                          | [78]      |
| 472 - 475                                    | Tacrine             | Ibuprofen                           | AChE from electric eel<br>47.25 nM / - (475)<br>39.16 nM (475, in the presence of H <sub>2</sub> O <sub>2</sub> )                                                             | Neuron-protective effects in the presence of H <sub>2</sub> O <sub>2</sub> .<br>H <sub>2</sub> O <sub>2</sub> – responsible drug release<br>Inhibiting of proinflammatory cytokines (TNF- $\alpha$ and IL- 1 $\beta$ )<br>Regulating apoptosis related proteins (Bax, Bcl-2 and cleaved caspase- 3) | [79]      |
| <b>Tacrine-Hupryridone hybrids</b>           |                     |                                     |                                                                                                                                                                               |                                                                                                                                                                                                                                                                                                     |           |
| 476                                          | Tacrine             | Hupryridone                         | AChE from rat serum, BChE rat cortex homogenate<br>8.8 / 81.5 nM (476)                                                                                                        | Low hepatotoxicity                                                                                                                                                                                                                                                                                  | [80 - 82] |
| <b>Tacrine – Donepezil hybrids</b>           |                     |                                     |                                                                                                                                                                               |                                                                                                                                                                                                                                                                                                     |           |
| 477 - 486                                    | Tacrine<br>6-Cl-THA | Donepezil                           | AChE/AChE/BChE<br>Bovine/human/human<br>0.09 / 0.27 / 66.3 nM (480)                                                                                                           | Antiaggregating properties                                                                                                                                                                                                                                                                          | [83, 84]  |
| <b>Tacrine-TPPU hybrids</b>                  |                     |                                     |                                                                                                                                                                               |                                                                                                                                                                                                                                                                                                     |           |
| 487 - 490                                    | 6-Cl-THA<br>Huprine | TPPU, a epoxide hydrolase inhibitor | Human AChE/BChE<br>12.9 / 179 nM (489)                                                                                                                                        | -                                                                                                                                                                                                                                                                                                   | [85]      |
| <b>Tacrine - Huprine hybrids</b>             |                     |                                     |                                                                                                                                                                               |                                                                                                                                                                                                                                                                                                     |           |
| 491 - 502                                    | Tacrine             | Huprine                             | Human AChE/BChE<br>0.89/24.6 nM (491)<br>0.42/44.2 nM (493)<br>0.74/75.2 nM (497)<br>0.31/51.3 nM (499)                                                                       | Antiaggregating properties                                                                                                                                                                                                                                                                          | [86]      |
| <b>Tacrine - Bifendate hybrids</b>           |                     |                                     |                                                                                                                                                                               |                                                                                                                                                                                                                                                                                                     |           |
| 503 – 507                                    | Tacrine             | Bifendate                           | AChE from electric eel<br>BChE from equine serum<br>615.51 / 4.02 nM (504)<br>27.32 / 8.63 nM (506)<br>hAChE/hBChE (for 100 nM)<br>73.25 / 3.1% (504)<br>60.44 / 69.67% (506) | Antiaggreating properties<br>Low hepatotoxicity                                                                                                                                                                                                                                                     | [87]      |
| <b>Tacrine hybrids with HDAC inhibitors</b>  |                     |                                     |                                                                                                                                                                               |                                                                                                                                                                                                                                                                                                     |           |
| 508- 535                                     | Tacrine<br>6-Cl-THA | Hydroxamates, HDAC inhibitors       | AChE from electric eel, BChE from equine serum<br>13.00 / 0.58 nM (512)<br>0.12 / 361 nM (517)<br>0.26 / 140.06 nM (535)                                                      | Antioxidant activity<br>Metal – chelating properties<br>Inhibition ob A $\beta$ aggregation<br>Dissolving of pre-formed A $\beta$ aggregates                                                                                                                                                        | [88]      |
| <b>Tactine hybrids with thio derivatives</b> |                     |                                     |                                                                                                                                                                               |                                                                                                                                                                                                                                                                                                     |           |

|                                                             |                                |                                                       |                                                                                                                                            |                                                                                                                                                                                                                                                                 |             |
|-------------------------------------------------------------|--------------------------------|-------------------------------------------------------|--------------------------------------------------------------------------------------------------------------------------------------------|-----------------------------------------------------------------------------------------------------------------------------------------------------------------------------------------------------------------------------------------------------------------|-------------|
| 536 -<br>541                                                | Tacrine<br>6-Cl-THA            | Thiol group                                           | AChE from electric eel, BChE from equine serum<br>7.37 / 7.04 (pIC <sub>50</sub> ) (540)                                                   | LTP enhancement<br>Neuroprotective activity<br>Low hepatotoxicity                                                                                                                                                                                               | [89]        |
| 542-<br>553                                                 | Tacrine<br>6-Cl-THA            | S-allylcysteine<br>S-propargylcysteine                | AChE from Torpedo californica<br>0.30 µm (545)                                                                                             | Neuroprotection                                                                                                                                                                                                                                                 | [90]        |
| 554                                                         | Tacrine                        | H <sub>2</sub> S donor                                | -                                                                                                                                          | AChE inhibition in the serum and hippocampus of AD mice<br>Antiinflammatory activity                                                                                                                                                                            | [91]        |
| <b>Tacrine hybrids with fluorescent probes</b>              |                                |                                                       |                                                                                                                                            |                                                                                                                                                                                                                                                                 |             |
| 555 -<br>564                                                | 6-Cl-THA                       | Phenylpyrano[3,2 -c]quinoline                         | *AChE from bovine human AChE/BChE<br>10.4* / 7.03 / 331 nM (557)                                                                           | Inhibitors of Aβ <sub>1-42</sub> self-aggregation.<br>BACE-1 inhibition (681)                                                                                                                                                                                   | [92]        |
| 565 -<br>568                                                | 6-Cl-THA                       | Tetrahydrobenzo[h][1,6]naphthyridine                  | Human AChE/BChE<br>0.006 / 120 nM (565)                                                                                                    | Antiaggregating properties                                                                                                                                                                                                                                      | [93]        |
| 569-<br>591                                                 | Tacrine                        | Lophine                                               | AChE from mice brain<br>Human BChE<br>5.87 / 108.97 nM (570)<br>n.a. / 7.10 nM (581)                                                       | -                                                                                                                                                                                                                                                               | [94]        |
| <b>Tacrine hybrids with Ca<sup>2+</sup> channel blocker</b> |                                |                                                       |                                                                                                                                            |                                                                                                                                                                                                                                                                 |             |
| 592 -<br>600                                                | Tacrine                        | Nimodipine                                            | *AChE from electric eel<br>Human AChE/BChE<br>*45 / 105/ 100000 nM (600)                                                                   | Block of Ca <sup>2+</sup> channels<br>Neuroprotection                                                                                                                                                                                                           | [95,<br>96] |
| 601 -<br>605                                                | Tacrine                        | Nimodipine                                            | AChE from electric eel, *Human AChE<br>45 / 105* (S-600)                                                                                   | Ca <sup>2+</sup> channel blockade<br>Inhibition of AChE-induced Aβ <sub>40</sub> aggregation                                                                                                                                                                    | [97]        |
| 606                                                         | Tacrine                        | Dihydropyridine                                       | -                                                                                                                                          | Reduction of phosphorylated tau levels, inhibition of the generation and release of Aβ in cells                                                                                                                                                                 | [98]        |
| 607-<br>618                                                 | Tacrine                        | Dihydropyrimidine-thiones                             | Human AChE/BChE<br>0.0373 / 1.27 µm (617)<br>5.28 / 0.372 µm (616)                                                                         | Ca <sup>2+</sup> channel blockade<br>Weak inhibition of Aβ <sub>40</sub> self-aggregation                                                                                                                                                                       | [99]        |
| 619 -<br>622                                                | Tacrine<br>6-Cl-THA<br>Huprine | Levetiracetam                                         | Human AChE/BChE<br>3.1 / 135 nM (±620)<br>4.2 / 232 nM (SSR-621)                                                                           | Anti-aggregating activity (Aβ <sub>42</sub> and tau)<br>Reduction of AChE activity in brain ( <i>ex vivo</i> test)<br>Reduction cortical amyloid burden and neuroinflammation around Aβ plaques were significantly reduced ( <i>ex vivo</i> test after therapy) | [100]       |
| <b>Tacrine hybrids with serotonin receptors antagonists</b> |                                |                                                       |                                                                                                                                            |                                                                                                                                                                                                                                                                 |             |
| 623 -<br>628                                                | Tacrine                        | 1 -(phenylsulfonyl)- 4 -(piperazin- 1 -yl)- 1H-indole | AChE from electric eel, BChE from equine serum; human *AChE/**BuChE;<br>7.1 / 12.4 / 1.3* nm (628)<br>45.9 / 8.2 / 12.9* / 29.7** nm (626) | 5HT <sub>6</sub> in agonists                                                                                                                                                                                                                                    | [101]       |

|                                                                  |                                |                                                                                               |                                                                                                                                    |                                                                                         |       |
|------------------------------------------------------------------|--------------------------------|-----------------------------------------------------------------------------------------------|------------------------------------------------------------------------------------------------------------------------------------|-----------------------------------------------------------------------------------------|-------|
| 629 - 638                                                        | Tacrine                        | 1 -(3 -(benzyloxy)- 2 -methylphenyl)piperazine<br>1 -benzyl- 4 -(piperazin- 1 -yl)- 1H-indole | AChE from electric eel, *human AChE, BChE from equine serum<br>0.005 / 0.003 / 0.024 $\mu$ M (634)                                 | Low hepatotoxicity<br>Antiaggregating properties                                        | [102] |
| 639 - 668                                                        | Tacrine                        | Vilazodone                                                                                    | AChE from rat cortex, BChE from rat serum<br>3.319 / 15.79 $\mu$ m (643)                                                           | Low hepatotoxicity<br>Low cardiotoxicity<br>5 -HT1A agonist<br>5 -HT reuptake inhibitor | [103] |
| <b>Tacrine hybrids with modulator of muscarinic receptors</b>    |                                |                                                                                               |                                                                                                                                    |                                                                                         |       |
| 669 - 674                                                        | Tacrine<br>6-Cl-THA            | Gallamine                                                                                     | *AChE from electric eel<br>Human AChE/BChE<br>0.467* / 7.61 / 1.50 nM (669)<br>28.9* / 23.2 / 2.40 nM (673)                        | Allosteric M2 receptor modulation                                                       | [104] |
| 675 - 690                                                        | Tacrine                        | Xanomeline                                                                                    | AChE from electric eel, BChE from equine serum<br>8.18 / 8.29 (pIC <sub>50</sub> ) (687)<br>8.21 / 8.23 (pIC <sub>50</sub> ) (690) | Enhanced M1 allosteric affinity                                                         | [105] |
| 691 - 711                                                        | Tacrine<br>6-Cl-THA<br>7-MEOTA | Benzylquinolone carboxylic acid (BQCA)                                                        | Human AChE/BChE<br>1.5 / 49.3 $\mu$ M (696)<br>0.13 / 0.67 $\mu$ M (699)<br>42 / 372 nM (706)                                      | Muscarinic receptors antagonists                                                        | [106] |
| 712 - 717                                                        | Tacrine                        | Xanomeline                                                                                    | AChE from electric eel<br>pIC <sub>50</sub> = 9.55 (715)                                                                           | -                                                                                       | [107] |
| <b>Tacrine hybrids with cannabinoid CB1 receptor antagonists</b> |                                |                                                                                               |                                                                                                                                    |                                                                                         |       |
| 718 - 721                                                        | Tacrine                        | Cannabinoid CB1 receptor antagonists                                                          | Human AChE<br>pIC <sub>50</sub> = 6.5 (720)                                                                                        | CB1 receptor antagonists                                                                | [108] |
| <b>Tacrine hybrids with modulator of NMDA receptors</b>          |                                |                                                                                               |                                                                                                                                    |                                                                                         |       |
| 722 - 728                                                        | 7 -MEOTA                       | Adamantylamine                                                                                | Human AChE/BChE<br>0.47 / 0.11 $\mu$ M (725)                                                                                       | -                                                                                       | [109] |
| 729 - 732                                                        | 6-Cl-THA                       | Benzohomoadamantane                                                                           | Human AChE/BChE<br>0.3 / 0.5 nM (731)                                                                                              | NMDA inhibition                                                                         | [110] |
| <b>Tacrine hybrids with modulator of opioid receptors</b>        |                                |                                                                                               |                                                                                                                                    |                                                                                         |       |
| 733 - 747                                                        | Tacrine<br>6-Cl-THA            | Tianeptine                                                                                    | AChE from rat brain homogenate<br>Human BChE<br>6.79 / 52.44 nM (736)<br>156.19 / 3.59 nM (737)                                    | Reduction of the <i>in vitro</i> basal secretion of S100B                               | [111] |
| <b>Tacrine hybrids with MAO inhibitors</b>                       |                                |                                                                                               |                                                                                                                                    |                                                                                         |       |
| 748 - 760                                                        | Tacrine<br>6-Cl-THA            | Selegiline                                                                                    | AChE from electric eel, BChE from equine serum<br>22.6 / 9.37 nM (754)                                                             | MAO-A,<br>MAO-B inhibition                                                              | [112] |
| 761 - 780                                                        | Tacrine                        | Coumarin                                                                                      | AChE from electric eel, BChE from equine serum<br>17.70 / 38.00 nM (766)<br>33.63 / 80.72 nM (773)                                 | MAO-B selective inhibition<br>Low neurotoxicity                                         | [113] |
| <b>Tacrine hybrids with natural products</b>                     |                                |                                                                                               |                                                                                                                                    |                                                                                         |       |

|                                               |                                |                                                                  |                                                                                                                                           |                                                                                                                                          |
|-----------------------------------------------|--------------------------------|------------------------------------------------------------------|-------------------------------------------------------------------------------------------------------------------------------------------|------------------------------------------------------------------------------------------------------------------------------------------|
| 781 - 800                                     | Tacrine                        | Coumarin                                                         | AChE from electric eel, BChE from equine serum<br>0.092 / 0.234 $\mu$ M (786)<br>0.398 / 0.099 $\mu$ M (790)                              | Metal-chelating ability<br>Antiaggregating properties<br>Low neurotoxicity, [114]                                                        |
| 801- 805                                      | Tacrine                        | Coumarin                                                         | Human AChE/BChE<br>0.0154 / 0.328 $\mu$ M (803)                                                                                           | - [115]                                                                                                                                  |
| 806 - 826                                     | Tacrine                        | Flavonoid                                                        | AChE from electric eel, BChE from equine serum<br>8.4 / 35.0 nM (825)<br>10.3 / 25.8 nM (826)                                             | Metal-chelating ability<br>Antiaggregating properties<br>Low neurotoxicity [116]                                                         |
| 827 - 834                                     | Huprine Y                      | Rhein                                                            | Human AChE/BChE<br>1.07 / 950 nM ( $\pm$ 827)<br>1.52 / 1070 nM ( $\pm$ 828)                                                              | Antiaggregating propertiesd<br>BACE-1 inhibition<br>Prevent the loss of synaptic proteins in hippocampal slices ( <i>ex vivo</i> ) [117] |
| 835 - 837                                     | Tacrine                        | Carbazole                                                        | AChE from electric eel; human BChE<br>0.48 / 52.14 $\mu$ M (835)                                                                          | Neuroprotection from ROS-or $A\beta$ -induced toxicity [118]                                                                             |
| 838 - 844                                     | 6-Cl-THA                       | Scutellarin                                                      | Human AChE/BChE<br>1.63 / 1210 nM (838)<br>1.9 / 174 nM (839)                                                                             | - [119]                                                                                                                                  |
| 845 – 852                                     | Tacrin<br>6-Cl-THA<br>7-MEOTA  | Resveratrol                                                      | Human AChE/BChE<br>0.8 / n.a. $\mu$ M (845)                                                                                               | Antiaggreating properties<br>Antiinflammatory activity [120]                                                                             |
| 853 – 861                                     | Tacrine                        | Carbohydrates                                                    | AChE from mice brain extract, BChE from mice blood serum<br>84.4 / 11.7 nM (854)<br>2.2 / 4.93 nM (857)                                   | - [121]                                                                                                                                  |
| 862 - 882                                     | Tacrine<br>6-Cl-THA<br>7-MEOTA | Tryptophan                                                       | Human AChE/BChE<br>6.3 / 9.1 nM (S-873)                                                                                                   | Inhibition of $A\beta_{42}$ -self-aggregation [122]                                                                                      |
| 883 - 889                                     | Tacrine                        | Indole                                                           | AChE from electric eel, BChE from equine serum<br>0.173 / 0.066 $\mu$ M (887)                                                             | - [123]                                                                                                                                  |
| 890 - 902                                     | Tacrine<br>6-Cl-THA            | Anacardic acid, cardanol, and cardol from cashew nutshell liquid | Human AChE/BChE<br>2.54 / 0.265 nM (891)<br>20.8 / 0.0352 nM (890)<br>17.0 / 0.177 nM (897)                                               | Antiinflammatory activity<br>Neuroprotection (890, 891) at 0.01 $\mu$ M<br>Low hepatotoxicity<br>Low neurotoxicity [124]                 |
| <b>Tacrine hybrids with organic scaffolds</b> |                                |                                                                  |                                                                                                                                           |                                                                                                                                          |
| 903 - 917                                     | Tacrin                         | Trimethoxybenzene                                                | Human AChE/BChE<br>5.08 / 1.38 nM (912)<br>59.00 / 0.139 nM (916)                                                                         | - [125]                                                                                                                                  |
| 918 - 921                                     | Tacrine                        | Tiofen-based photoswitcher                                       | AChE from electric eel, BChE from equine serum<br>*Human AChE<br>4.3 / 5.9 / 49.6* nM (open) (921)<br>1.8 / 7.2 / 19.1* nM (closed) (921) | Inhibition of AChE-induced $A\beta$ aggregation [126]                                                                                    |
| 922 - 939                                     | Tacrine<br>6-Cl-THA<br>7-MEOTA | Quinone                                                          | Human AChE/BChE<br>1.93 / 256 nM (926)<br>0.72 / 542 nM (930)                                                                             | Antiaggregating properties<br>Neuroprotection from ROS-or $A\beta$ -induced toxicity [127]                                               |

| Low hepatotoxicity |                                |                  |                                                                                                                         |                                                                                                                |
|--------------------|--------------------------------|------------------|-------------------------------------------------------------------------------------------------------------------------|----------------------------------------------------------------------------------------------------------------|
| 940 - 944          | Tacrine<br>6-Cl-THA            | Propargylamine   | AChE from electric eel, BChE from equine serum<br>11.2 / 83.5 nM (941)                                                  | Low hepatotoxicity<br>Low neurotoxicity [128]                                                                  |
| 945 - 953          | 7-MEOTA                        | p-Anisidine      | Human AChE<br>9.4 ± 0.7 (941)<br>Human AChE/BChE<br>1.36 / 10.2 µM (951)<br>1.35 / 10.9 µM (955)                        | - [129]                                                                                                        |
| 959 - 973          | Tacrine<br>6-Cl-THA            | Triazole         | AChE from electric eel, BChE from equine serum<br>2.00 / 0.055 µM (968)<br>0.521 / 1.853 µM (970)                       | - [130]                                                                                                        |
| 974 - 989          | Tacrine                        | Isatine          | AChE from electric eel, BChE from equine serum<br>57.85 / 0.11 nM (977)<br>0.42 / 0.57 nM (984)<br>0.62 / 3.52 nM (986) | Inhibition of self-induced Aβ <sub>1-40</sub> aggregation<br>Metal-chelating properties [131]                  |
| 990 - 1039         | Tacrine<br>6-Cl-THA<br>7-MEOTA | Pyrimidone       | AChE from the cerebral cortex of a mouse 51.1 / - nM (1035)                                                             | GSK-3β inhibition<br>Regulation of the tau protein pathway in SH-SY5Y-derived neurons<br>Neuroprotection [132] |
| 1040 - 1052        | Tacrine                        | Carbamate        | Human AChE/BChE<br>22.15 / 16.96 nM (1050)                                                                              | - [133]                                                                                                        |
| 1053 - 1066        | Tacrine                        | Phosphorus group | AChE from electric eel, BChE from equine serum<br>6.11 / 12.86 nM (1055)                                                | Lower hepatotoxicity <i>in vitro</i> [134]                                                                     |

**Table S2.** Summary of *in vivo* study of anti-AD properties of the hybrids.

| Hybrid        | Tacrin   | Second moiety                  | Mode of injection, drug dose         | <i>In vivo</i> effects                                                                                                                                                                                      | Ref.     |
|---------------|----------|--------------------------------|--------------------------------------|-------------------------------------------------------------------------------------------------------------------------------------------------------------------------------------------------------------|----------|
| 101           | Tacrine  | Silibinin                      | i.p.<br>2 µmol/100 g                 | Low hepatotoxicity <i>in vivo</i><br>Cognitive improvement in scopolamine-injected mice, similar to that of tacrine                                                                                         | [47, 48] |
| 165           | Tacrine  | Phenolic acids<br>Ligustrazine | i.g.<br>1.27 mg/100 daily<br>4 weeks | Low hepatotoxicity <i>in vivo</i><br>After 4 weeks of intragastric administration, cognitive function and synaptic plasticity were significantly improved and Aβ plaques were decreased in the APP/PS1 mice | [55]     |
| 193, 197      | 6-Cl-THA | Antioxidant CR-6               | i.p.<br>10 mg/kg/day<br>4 weeks      | Positive tendencies in improving cognition, oxidative stress, and amyloid pathology on wild-type and APP/PS1 mice                                                                                           | [56]     |
| 216, 225, 226 | Tacrine  | Chalkone                       | 5 mg/kg/day<br>1 week                | <i>In vivo</i> behavior studies showed a cognitive improvement in mice pretreated with scopolamine. Recovery of scopolamine-induced glutathione depletion, in-brain malondialdehyde (MDA) level decrease    | [57]     |



|               |           |                                      |                                                                                                                                         |                                                                                                                                                                                                                                                                                         |      |
|---------------|-----------|--------------------------------------|-----------------------------------------------------------------------------------------------------------------------------------------|-----------------------------------------------------------------------------------------------------------------------------------------------------------------------------------------------------------------------------------------------------------------------------------------|------|
| 249           | Huprine Y | Capsaicin                            | i.p.<br>2 mg/kg<br>3 times/week<br>4 weeks                                                                                              | Significant enhance of learning and memory in 10-month-old APP/PS1 mice. Decrease of the A $\beta$ <sub>42</sub> /A $\beta$ <sub>40</sub> ratio in hippocampus. Improvement in basal synaptic efficacy, and significant reduction of hippocampal oxidative stress and neuroinflammation | [58] |
| 254           | Tacrine   | Ferulic acid                         | i.p.<br>1.22 mg/100g                                                                                                                    | No improvement in scopolamine-injected mice (compd. amplifies scopolamine action)                                                                                                                                                                                                       | [60] |
| 255           | Tacrine   | Ferulic acid                         | i.g.<br>2 mg/kg/day,<br>20 mg/kg/day<br>3 weeks                                                                                         | Cognitive impairment, increase of ChAT activity and decreases AChE activity in A $\beta$ icv mice                                                                                                                                                                                       | [61] |
| 262           | Tacrine   | Ferulic acid + NO-donors             | i.d.<br><u>Behavioral studies</u><br>1.978 $\mu$ mol/100 g<br><u>Hepatotoxicity study</u><br>11.86 $\mu$ mol/100 g                      | Cognitive improvement in scopolamine-injected mice<br>Low hepatotoxicity <i>in vivo</i>                                                                                                                                                                                                 | [62] |
| 285, 288      | Tacrine   | Ferulic acid                         | i.g.<br>30 mg/kg/day                                                                                                                    | Cognition improving in scopolamine-injected adult ICR mice<br>Low hepatotoxicity <i>in vivo</i>                                                                                                                                                                                         | [64] |
| 295, 303, 310 | Tacrine   | NO-donating groups                   | i.p.<br><u>Hepatotoxicity study</u><br>5.93 $\mu$ mol/ 100 g<br><u>Behavioral studies</u><br>1.978 $\mu$ mol/100 g                      | Much less hepatotoxicity compared to tacrine (295, 303).<br>Cognition improving in scopolamine-injected mice                                                                                                                                                                            | [66] |
| 332           | 6-Cl-THA  | Phenothiazine                        | i.p.<br>14 mg/kg                                                                                                                        | Non-toxic in doses 14 mg/kg<br><i>In vivo</i> CNS availability, relatively low elimination from the brain tissue                                                                                                                                                                        | [68] |
| 386           | Tacrine   | Benzofuran                           | Oral intake<br><u>Behavioral studies</u><br>20 $\mu$ mol/kg/day<br>10 days<br><u>Hepatotoxicity</u><br>equimolar to 30 mg/kg of tacrine | Low hepatotoxicity <i>in vivo</i><br>Cognitive improvements in ICR mice                                                                                                                                                                                                                 | [71] |
| 436           | 6-Cl-THA  | Benzotiazole                         | i.p.<br>2 mg/kg/day<br>4 days                                                                                                           | Mild cognitive improvements                                                                                                                                                                                                                                                             | [74] |
| 442, 456      | Tacrine   | Flurbiprofen + NO-donors             | i.d.<br><u>Behavioral studies</u><br>1.978 $\mu$ mol/100 g<br><u>Hepatotoxicity</u><br>11.86 $\mu$ mol/100 g                            | Cognition improving activity in ICR mice<br>Low hepatotoxicity <i>in vivo</i> (Hybrid 456 showed the lowest toxicity)                                                                                                                                                                   | [77] |
| 475           | Tacrine   | Ibuprofen                            | i.p.<br>0.9 mg/100g/day<br>4 weeks                                                                                                      | Improving spatial memory of A $\beta$ -induced AD model rats                                                                                                                                                                                                                            | [79] |
| 476           | Tacrine   | Hupryridone                          | i.p.<br>0.36 $\mu$ mol/kg<br>0.72 $\mu$ mol/kg every third day, 28 weeks                                                                | Attenuates scopolamine-induced impairments of cognition in APP/PS1 mice.<br>At high concentrations (10 $\mu$ M) did not induce obvious hepatotoxicity                                                                                                                                   | [80] |
| 489           | 6-Cl-THA  | TPPU, an epoxide hydrolase inhibitor | Oral intake<br>2 mg/kg/day<br>4 weeks                                                                                                   | Significant amelioration in short-term and long-term working memory of SAMP8 mice<br>Reduction of neuroinflammation<br>lack of neurotoxicity                                                                                                                                            | [85] |
| 506           | Tacrine   | Bifendate                            | Oral intake<br><u>Behavioral studies</u><br>20 $\mu$ mol/kg/day<br>4 days<br><u>Hepatotoxicity studies</u><br>i.g.<br>106 mg/kg         | Low hepatotoxicity <i>in vivo</i><br>Ameliorated the cognition impairment in the scopolamine treated ICR mice (8–10 weeks old).                                                                                                                                                         | [87] |
| 536, 537      | Tacrine   | Thiol group                          | i.c.v.                                                                                                                                  | Enhance of the hippocampal LTP <i>in vivo</i>                                                                                                                                                                                                                                           | [89] |

|              |                     |                                                         |                                                                                                                                                                        |                                                                                                                                                                                                                                                                      |           |
|--------------|---------------------|---------------------------------------------------------|------------------------------------------------------------------------------------------------------------------------------------------------------------------------|----------------------------------------------------------------------------------------------------------------------------------------------------------------------------------------------------------------------------------------------------------------------|-----------|
| 541          | 6-Cl-THA            |                                                         | <u>Synaptic plasticity study</u><br>50 $\mu$ M (541)<br><u>Hepatotoxicity</u><br>6 $\mu$ mol/100 g (536 - 537)                                                         | Low hepatotoxicity <i>in vivo</i>                                                                                                                                                                                                                                    |           |
| 542          | Tacrine             | H <sub>2</sub> S donor                                  | i.p.<br>15 mmol/kg/day<br>20 days                                                                                                                                      | Improvement of cognitive and locomotor activity in AD mice (therapeutic effect of the lower dose was only partial)<br>Low hepatotoxicity <i>in vivo</i>                                                                                                              | [90]      |
| 598, 605     | Tacrine<br>6-Cl-THA | Huprine                                                 | i.p.<br>10 $\mu$ mol/kg                                                                                                                                                | <i>Ex vivo</i> inhibition of AChE from OF1 mice                                                                                                                                                                                                                      | [96],[97] |
| 619, 622     | Tacrine<br>Huprine  | Levetiracetam                                           | <u>Inhibition of AChE</u><br>i.p.<br>2.5 mg/kg (619)<br>5 mg/kg (621)<br><u>Efficacy Studies</u><br>i.p.<br>5 mg/kg/day<br>4 weeks                                     | Inhibition of C57BL/6J mouse brain AChE 10 min after administration<br>A reduction of number of epileptic seizures and reduction of A $\beta$ burden in the cortex of APP/PS1 mice (621)<br>Cognitive improvement in transgenic 5-month-old APP/PS1 mice (619, 621). | [100]     |
| 626          | Tacrine             | 1 - (phenylsulfonyl)-4 - (piperazin- 1 - yl)- 1H-indole | i.p.<br>0.3 - 10.0 mg/kg                                                                                                                                               | Cognitive improvement in scopolamine-injected mice. Dose-dependent reduction of scopolamine-induced hyperlocomotion                                                                                                                                                  | [101]     |
| 643          | Tacrine             | Vilazodone                                              | Oral intake<br>30 mg/kg                                                                                                                                                | Behaviour impairment in scopolamine-treated mice<br>Alleviation of the depressive symptom in tail suspension test                                                                                                                                                    | [103]     |
| 696          | Tacrine             | Xanomeline                                              | i.p.<br>2 $\mu$ mol/100 g                                                                                                                                              | Significantly enhance scopolamine action                                                                                                                                                                                                                             | [106]     |
| 831          | Huprine Y           | Rhein                                                   | <u>Determination of Synaptic Protein Levels</u><br>i.v.<br>10 $\mu$ M<br><u>A<math>\beta</math> Lowering Effect</u><br>i.p.<br>2 mg/kg<br>3 times per week for 4 weeks | <i>Ex vivo</i> reduction of A $\beta$ levels of in hippocampus (2-month-old C57BL/6 mice)<br>An increase of APP levels in brain of 10-month-old APP/PS1 mice                                                                                                         | [117]     |
| 835          | Tacrine             | Carbazole                                               | i.p.<br>25 $\mu$ mol/kg<br>50 $\mu$ mol/kg                                                                                                                             | Improve memory deficit in mice induced by scopolamine                                                                                                                                                                                                                | [118]     |
| (S)-873      | 6-Cl-THA            | Tryptophan                                              | <u>Behavioral studies</u><br>i.c.v.<br>10 nM 100 nM<br><u>Toxicity study</u><br>i.p.<br>70 mg/kg                                                                       | Pro-cognitive potential in a scopolamine-induced cognitive deficit rat model (9 - 12 weeks old wistar rats)                                                                                                                                                          | [122]     |
| 926, 930     | 6-Cl-THA            | Quinone                                                 | i.p.<br>10 $\mu$ mol/kg<br>50 $\mu$ mol/kg                                                                                                                             | <i>Ex vivo</i> dose-dependent inhibition of cholinesterase activity in telencephalon                                                                                                                                                                                 | [127]     |
| 970          | Tacrine             | Triazole                                                | i.p.<br>5 mg/kg/day<br>10 mg/kg/day<br>20 mg/kg/day.<br>4 days                                                                                                         | Memory improvement in scopolamine-induced impairment for all concentrations                                                                                                                                                                                          | [130]     |
| 1017<br>1035 | Tacrine<br>6-Cl-THA | Pyrimidone                                              | i.p.<br>15 mg/kg/day<br>15 days                                                                                                                                        | Significant amelioration of memory and spatial behavior in Scop-injected mice (8–10 weeks old)<br>Hybrid was 1035 slightly better than 1017                                                                                                                          | [132]     |
